# Supplementary material
Source: PubMed Central journal article supplement (PMC18977)
Supplement: pnas_97_26_14674__1.pdf [file pnas_97_26_14674__1.pdf]

**Table 2.** (R/G)<sub>median</sub> of 99 genes over 11 experiments

| UNIQID | Name        | a=glnLup(Cy5) vs glnLup nac(Cy3) [NH3], 2nd PCR =>Nac control                  | b=glnLup(Cy5) vs glnLup nac(Cy3) [Gln], 2nd PCR =>Nac control | c=glnLup(Cy5) vs glnG(Cy3) [NH3], 1st PCR =>NtrC&Nac control | d=glnLup(Cy5) vs glnG(Cy3) [NH3], 2nd PCR =>NtrC&Nac control | e=glnLup(Cy5) vs glnG(Cy3) [Gln], 1st PCR =>NtrC&Nac control | f=glnLup(Cy5) vs glnG(Cy3) [Gln], 2nd PCR =>NtrC&Nac control | g=glnLup nac(Cy5) vs glnG(Cy3) [NH3], 1st PCR =>NtrC control | h=glnLup nac(Cy5) vs glnG(Cy3) [Gln], 2nd PCR =>NtrC control | i=Gln(Cy5) vs NH3(Cy3) [glnG], 1st PCR =>other control | j=NH3(Cy5) vs Gln(Cy3) [gln], 1st PCR | k=NH3(Cy5) vs Gln(Cy3) [gln], 1st PCR |     |
|--------|-------------|--------------------------------------------------------------------------------|---------------------------------------------------------------|--------------------------------------------------------------|--------------------------------------------------------------|--------------------------------------------------------------|--------------------------------------------------------------|--------------------------------------------------------------|--------------------------------------------------------------|--------------------------------------------------------|---------------------------------------|---------------------------------------|-----|
| b0315  | b0315 yahA  | orf, hypothetical protein                                                      | 1.3                                                           | 1.1                                                          | 3.6                                                          | 1.2                                                          | 2.1                                                          | 1.3                                                          | 1                                                            | 1.1                                                    | 0.8                                   | 0.8                                   | 2.5 |
| b0336  | b0336 codB  | cytosine permease/transport                                                    | 1.8                                                           | 6.3                                                          | 3.1                                                          | 2.1                                                          | 11.9                                                         | 6                                                            | 0.9                                                          | 1.1                                                    | 0.3                                   | 0.2                                   | 0.1 |
| b0337  | b0337 codA  | cytosine deaminase                                                             | 1.8                                                           | 3.4                                                          | 2.8                                                          | 2.4                                                          | 7.3                                                          | 3.7                                                          | 0.7                                                          | 1                                                      | 0.4                                   | 0.3                                   | 0.1 |
| b0450  | b0450 glnK  | nitrogen regulatory protein P-II 2                                             | 0.9                                                           | 0.7                                                          |                                                              | 10.3                                                         |                                                              | 17.2                                                         | 19.6                                                         | 26.1                                                   |                                       |                                       |     |
| b0451  | b0451 amtB  | probable ammonium transporter                                                  | 0.9                                                           | 1                                                            | 6.2                                                          | 0.9                                                          | 7.9                                                          | 0.9                                                          | 1.3                                                          | 1                                                      | 1.2                                   | 0.1                                   | 0.3 |
| b0452  | b0452 tesB  | acyl-CoA thioesterase II                                                       | 1                                                             | 1                                                            | 3.3                                                          | 1.5                                                          | 2.2                                                          | 1.2                                                          | 1.2                                                          | 1.1                                                    | 1.8                                   | 0.4                                   | 0.4 |
| b0652  | b0652 gltL  | ATP-binding protein of glutamate/aspartate transport system                    | 1.1                                                           | 0.8                                                          | 1.5                                                          | 1.2                                                          | 1.7                                                          | 1.3                                                          | 1.5                                                          | 1.4                                                    | 1.1                                   | 0.8                                   | 0.9 |
| b0653  | b0653 gltK  | glutamate/aspartate transport system permease                                  | 1                                                             | 0.9                                                          | 1.6                                                          | 1.1                                                          | 2                                                            | 1.3                                                          | 1.1                                                          | 1.6                                                    | 0.8                                   | 1                                     | 1.1 |
| b0654  | b0654 gltJ  | glutamate/aspartate transport system permease                                  | 1.1                                                           | 1.1                                                          | 1.7                                                          | 1.1                                                          | 2.2                                                          | 1.4                                                          | 1.2                                                          | 0.6                                                    | 0.8                                   | 0.7                                   |     |
| b0655  | b0655 ybeJ  | putative periplasmic binding transport protein                                 | 1.3                                                           | 1.4                                                          | 3.4                                                          | 0.8                                                          | 6.5                                                          | 1.1                                                          | 1.6                                                          | 1                                                      | 0.9                                   | 0.8                                   | 0.7 |
| b0809  | b0809 glnQ  | ATP-binding component of glutamine high-affinity transport system              | 1.1                                                           | 0.4                                                          | 2.7                                                          | 1.9                                                          | 3.6                                                          | 2                                                            | 1.3                                                          | 4.9                                                    | 0.8                                   | 0.5                                   | 0.5 |
| b0810  | b0810 glnP  | glutamine high-affinity transport system; membrane component                   | 1.2                                                           | 0.6                                                          | 3.5                                                          | 2.1                                                          | 6                                                            | 2.9                                                          | 2.3                                                          | 6.4                                                    | 1                                     | 0.4                                   | 0.5 |
| b0811  | b0811 glnH  | periplasmic glutamine-binding protein; permease                                | 1                                                             | 0.5                                                          | 4.5                                                          | 5.8                                                          | 9.4                                                          | 4.7                                                          | 5.9                                                          | 11.3                                                   | 1.1                                   | 0.3                                   | 0.4 |
| b0854  | b0854 potF  | periplasmic putrescine-binding protein; permease protein                       | 1.4                                                           | 0.9                                                          | 4.8                                                          | 3.4                                                          | 6.3                                                          | 2.6                                                          | 2.6                                                          | 3.7                                                    | 1.3                                   | 0.3                                   | 0.3 |
| b0855  | b0855 potG  | ATP-binding component of putrescine transport system                           | 1.3                                                           | 0.8                                                          | 1.9                                                          | 2.1                                                          | 4                                                            | 1.6                                                          | 1.2                                                          | 2.3                                                    | 1                                     | 0.4                                   | 0.4 |
| b0856  | b0856 potH  | putrescine transport protein; permease                                         | 1.2                                                           | 0.9                                                          | 2.5                                                          | 1.5                                                          | 2.6                                                          | 1.2                                                          | 1.2                                                          | 1.9                                                    | 0.9                                   | 0.5                                   | 0.5 |
| b0857  | b0857 potI  | putrescine transport protein; permease                                         | 1.1                                                           | 0.9                                                          | 1.2                                                          | 1.1                                                          | 1.7                                                          | 0.9                                                          | 0.6                                                          | 1.3                                                    | 0.9                                   | 0.7                                   | 0.7 |
| b0897  | b0897 ycaC  | orf, hypothetical protein                                                      | 1.7                                                           | 0.5                                                          | 1.9                                                          | 2.6                                                          | 1                                                            | 0.4                                                          | 0.9                                                          | 0.6                                                    | 4.4                                   | 0.3                                   | 0.4 |
| b0929  | b0929 ompF  | outer membrane protein 1a (la;b;F)                                             | 2.6                                                           | 8.8                                                          | 4.1                                                          | 4.9                                                          | 24.9                                                         | 28.8                                                         | 2.1                                                          | 2.8                                                    | 0.2                                   | 0.5                                   | 0.6 |
| b1006  | b1006 ycdG  | putative transport protein                                                     | 1.1                                                           | 0.6                                                          | 5.1                                                          | 2.6                                                          | 6.5                                                          | 2.4                                                          | 1.5                                                          | 5.9                                                    | 1                                     | 0.2                                   | 0.2 |
| b1007  | b1007 b1007 | orf, hypothetical protein                                                      | 1                                                             | 0.6                                                          | 1.8                                                          | 2                                                            | 6.6                                                          | 3.1                                                          | 2.3                                                          | 6.4                                                    | 1                                     | 0.3                                   | 0.2 |
| b1008  | b1008 b1008 | putative enzyme                                                                | 1                                                             | 0.7                                                          | 16                                                           | 2.4                                                          | 16.9                                                         | 3                                                            | 2.4                                                          | 6.1                                                    | 1.5                                   | 0.3                                   | 0.1 |
| b1009  | b1009 b1009 | putative acetyltransferase                                                     | 1                                                             | 0.7                                                          | 7.1                                                          | 4.4                                                          | 17.1                                                         | 3.5                                                          | 3.3                                                          | 9.3                                                    | 1                                     | 0.3                                   | 0.1 |
| b1010  | b1010 b1010 | orf, hypothetical protein                                                      | 1                                                             | 0.6                                                          | 4                                                            | 1.9                                                          | 2.8                                                          | 2.6                                                          | 2.4                                                          | 4.3                                                    | 0.8                                   | 0.6                                   | 0.3 |
| b1011  | b1011 b1011 | putative synthetase                                                            | 1.2                                                           | 0.6                                                          | 25                                                           | 5.5                                                          | 32.9                                                         | 3.4                                                          | 2.7                                                          | 8.4                                                    | 1                                     | 0.2                                   | 0.1 |
| b1012  | b1012 b1012 | orf, hypothetical protein                                                      | 1.2                                                           | 0.7                                                          | 26.3                                                         | 10.6                                                         | 51.8                                                         | 6.7                                                          | 4.3                                                          | 15.8                                                   | 1.1                                   | 0.1                                   | 0.1 |
| b1034  | b1034 ycdX  | orf, hypothetical protein                                                      | 1                                                             | 1.1                                                          | 3.6                                                          | 1.1                                                          | 4.9                                                          | 1.1                                                          | 0.9                                                          | 1.1                                                    | 1.1                                   | 0.7                                   | 0.6 |
| b1035  | b1035 ycdY  | putative oxidoreductase component                                              | 0.9                                                           | 0.9                                                          | 0.7                                                          | 1.1                                                          | 0.9                                                          | 1                                                            | 1.4                                                          | 1.1                                                    | 0.9                                   | 1.3                                   | 1.5 |
| b1217  | b1217 chaB  | cation transport regulator                                                     | 1.1                                                           | 0.9                                                          | 1                                                            | 1.2                                                          | 1.1                                                          | 0.8                                                          | 1                                                            | 0.9                                                    | 0.9                                   | 1                                     | 1   |
| b1218  | b1218 chaC  | cation transport regulator                                                     | 1.2                                                           | 0.7                                                          | 3.8                                                          | 1.7                                                          | 5.3                                                          | 1.5                                                          | 1.1                                                          | 2.5                                                    | 1.4                                   | 0.2                                   | 0.4 |
| b1243  | b1243 oppA  | oligopeptide transport; periplasmic binding protein                            | 1.4                                                           | 1.7                                                          | 2                                                            | 2.8                                                          | 5.8                                                          | 3.7                                                          | 1.4                                                          | 2.7                                                    | 0.3                                   | 2.4                                   | 0.9 |
| b1244  | b1244 oppB  | oligopeptide transport permease protein                                        | 1.3                                                           | 1.6                                                          | 1.4                                                          | 1.6                                                          | 3.3                                                          | 2.2                                                          | 0.9                                                          | 1.4                                                    | 0.3                                   | 1.2                                   | 0.9 |
| b1245  | b1245 oppC  | homolog of Salmonella oligopeptide transport permease protein                  | 1.2                                                           | 1.4                                                          | 1.3                                                          | 1.2                                                          | 3                                                            |                                                              | 0.9                                                          | 1.4                                                    | 0.4                                   | 1.1                                   | 1   |
| b1246  | b1246 oppD  | homolog of Salmonella ATP-binding protein of oligopeptide ABC transport system | 1.3                                                           | 1.6                                                          | 1.6                                                          | 1.3                                                          | 3.9                                                          | 1.7                                                          | 1.3                                                          | 1.2                                                    | 0.4                                   | 0.8                                   | 0.7 |
| b1296  | b1296 ycjJ  | putative amino acid/amine transport protein                                    | 1.2                                                           | 1.1                                                          | 3                                                            | 1.2                                                          | 2.7                                                          | 0.9                                                          | 0.8                                                          | 1.1                                                    | 1.8                                   | 0.5                                   | 0.4 |
| b1384  | b1384 feaR  | regulatory protein for 2-phenylethylamine catabolism                           | 1.3                                                           | 1.3                                                          | 2.7                                                          | 1.9                                                          | 3.6                                                          | 1.1                                                          | 0.8                                                          | 0.9                                                    | 0.7                                   | 0.3                                   | 0.9 |
| b1440  | b1440 b1440 | putative transport protein                                                     | 2.5                                                           | 6.1                                                          | 3.8                                                          | 3                                                            | 7.4                                                          | 4.8                                                          | 0.7                                                          | 0.9                                                    | 1                                     | 0.4                                   | 0.3 |
| b1441  | b1441 b1441 | putative ATP-binding component of a transport system                           | 1.8                                                           | 2.3                                                          | 2.1                                                          | 1.8                                                          | 3.3                                                          | 2.3                                                          | 2.2                                                          | 1                                                      | 1.3                                   | 0.6                                   | 0.5 |
| b1442  | b1442 b1442 | putative transport system permease protein                                     | 1.3                                                           | 2.1                                                          | 2.6                                                          | 1.4                                                          | 3.9                                                          | 1.8                                                          | 0.8                                                          | 1                                                      | 1.1                                   | 0.6                                   | 0.6 |
| b1443  | b1443 b1443 | putative transport system permease protein                                     | 1.9                                                           | 2                                                            | 1.6                                                          | 1.8                                                          | 2.6                                                          | 1.8                                                          | 0.9                                                          | 1                                                      | 0.9                                   | 0.7                                   | 0.5 |
| b1444  | b1444 b1444 | putative aldehyde dehydrogenase                                                | 1.9                                                           | 2.2                                                          | 3.8                                                          | 4.3                                                          | 5.3                                                          | 2.6                                                          | 1.2                                                          | 1.2                                                    | 1.2                                   | 0.3                                   | 0.3 |
| b1483  | b1483 b1483 | putative ATP-binding component of a transport system                           | 0.9                                                           | 0.9                                                          | 5.3                                                          | 2                                                            | 4.5                                                          | 1.7                                                          | 1.9                                                          | 2.5                                                    | 1.3                                   | 0.6                                   | 0.3 |
| b1484  | b1484 b1484 | putative ATP-binding component of a transport system                           | 1.1                                                           | 0.9                                                          | 6.9                                                          | 2.4                                                          | 6.7                                                          | 2.9                                                          | 1.8                                                          | 3.6                                                    | 0.9                                   | 0.5                                   | 0.3 |
| b1485  | b1485 b1485 | putative transport protein                                                     | 1.1                                                           | 0.9                                                          | 4.9                                                          | 2.1                                                          | 7.2                                                          | 2.1                                                          | 1.5                                                          | 2.9                                                    | 1                                     | 0.5                                   | 0.5 |
| b1486  | b1486 b1486 | putative transport system permease protein                                     | 1.1                                                           | 0.9                                                          | 1                                                            | 1.9                                                          | 1.2                                                          | 2.2                                                          | 2.5                                                          | 3.2                                                    | 0.8                                   | 1.1                                   | 0.8 |
| b1487  | b1487 b1487 | putative hemin-binding lipoprotein                                             | 1                                                             | 0.6                                                          | 50.4                                                         | 18.3                                                         | 65.3                                                         | 7.2                                                          | 4.9                                                          | 15.2                                                   | 0.9                                   | 0                                     | 0.1 |
| b1488  | b1488 b1488 | orf, hypothetical protein                                                      | 0.8                                                           | 0.8                                                          | 9.7                                                          | 4.7                                                          | 14.6                                                         | 3.1                                                          | 4.1                                                          | 4.9                                                    | 0.8                                   | 0.1                                   | 0.1 |
| b1492  | b1492 xasA  | acid sensitivity protein, putative transporter                                 | 2.9                                                           | 1.1                                                          | 2.4                                                          | 2.6                                                          | 0.6                                                          | 0.4                                                          | 1.2                                                          | 0.3                                                    | 9.4                                   | 0.2                                   | 0.1 |
| b1493  | b1493 gadB  | glutamate decarboxylase isozyme                                                | 4.9                                                           | 1.3                                                          | 2.7                                                          | 4.5                                                          | 0.7                                                          | 0.3                                                          | 0.5                                                          | 0.2                                                    | 13.4                                  | 0.2                                   | 0   |
| b1537  | b1537 ydeJ  | orf, hypothetical protein                                                      | 1                                                             | 1.2                                                          | 1                                                            | 0.9                                                          | 0.9                                                          | 1                                                            | 1.3                                                          | 0.9                                                    | 1.3                                   | 0.8                                   | 0.9 |
| b1744  | b1744 ydjS  | orf, hypothetical protein                                                      | 0.9                                                           | 0.8                                                          | 6.9                                                          | 1.6                                                          | 6.3                                                          | 1.3                                                          | 1.4                                                          | 1.9                                                    | 1.2                                   | 0.3                                   | 0.3 |
| b1745  | b1745 b1745 | orf, hypothetical protein                                                      | 0.9                                                           | 0.7                                                          | 4                                                            | 1.8                                                          | 5.3                                                          | 1.7                                                          | 1.5                                                          | 2.6                                                    | 1.3                                   | 0.4                                   | 0.4 |
| b1746  | b1746 b1746 | putative aldehyde dehydrogenase                                                | 0.9                                                           | 0.7                                                          | 11.5                                                         | 2                                                            | 7.3                                                          | 1.6                                                          | 1.4                                                          | 2.4                                                    | 1.4                                   | 0.3                                   | 0.2 |

| UNIQUID | Name  | a= <i>glnLup</i> (Cy5) vs <i>glnLup</i> <i>nac</i> (Cy3) [NH3], 2nd PCR =>Nac control | b= <i>glnLup</i> (Cy5) vs <i>glnLup</i> <i>nac</i> (Cy3) [Gln], 2nd PCR =>Nac control            | c= <i>glnLup</i> (Cy5) vs <i>glnG</i> (Cy3) [NH3], 1st PCR =>NtrC&Nac control | d= <i>glnLup</i> (Cy5) vs <i>glnG</i> (Cy3) [NH3], 2nd PCR =>NtrC&Nac control | e= <i>glnLup</i> (Cy5) vs <i>glnG</i> (Cy3) [Gln], 1st PCR =>NtrC&Nac control | f= <i>glnLup</i> (Cy5) vs <i>glnG</i> (Cy3) [Gln], 2nd PCR =>NtrC&Nac control | g= <i>glnLup</i> <i>nac</i> (Cy5) vs <i>glnG</i> (Cy3) [NH3], 1st PCR =>NtrC control | h= <i>glnLup</i> <i>nac</i> (Cy5) vs <i>glnG</i> (Cy3) [Gln], 2nd PCR =>NtrC control | i=Gln(Cy5) vs NH3(Cy3) [ <i>glnG</i> ], 1st PCR =>other control | j=NH3(Cy5) vs Gln(Cy3) [ <i>glnG</i> ], 1st PCR | k=NH3(Cy5) vs Gln(Cy3) [ <i>glnG</i> ], 1st PCR |     |     |
|---------|-------|---------------------------------------------------------------------------------------|--------------------------------------------------------------------------------------------------|-------------------------------------------------------------------------------|-------------------------------------------------------------------------------|-------------------------------------------------------------------------------|-------------------------------------------------------------------------------|--------------------------------------------------------------------------------------|--------------------------------------------------------------------------------------|-----------------------------------------------------------------|-------------------------------------------------|-------------------------------------------------|-----|-----|
| b1747   | b1747 | b1747                                                                                 | orf, hypothetical protein                                                                        | 0.8                                                                           | 0.8                                                                           | 2.3                                                                           | 2.9                                                                           | 8.2                                                                                  | 1.8                                                                                  | 1.8                                                             | 3.6                                             | 0.8                                             | 0.3 | 0.2 |
| b1748   | b1748 | cstC                                                                                  | acetylornithine delta-aminotransferase                                                           | 0.8                                                                           | 0.6                                                                           | 7.7                                                                           | 3.6                                                                           | 10.9                                                                                 | 3.4                                                                                  | 2.2                                                             | 7.9                                             | 0.7                                             | 0.2 | 0.2 |
| b1783   | b1783 | yeaG                                                                                  | orf, hypothetical protein                                                                        | 1.4                                                                           | 0.5                                                                           | 4.5                                                                           | 4.4                                                                           | 2.9                                                                                  | 1.1                                                                                  | 1.7                                                             | 2.4                                             | 3                                               | 0.6 | 0.3 |
| b1784   | b1784 | yeaH                                                                                  | orf, hypothetical protein                                                                        | 1.2                                                                           | 0.6                                                                           | 4.1                                                                           | 3.1                                                                           | 2.5                                                                                  | 0.9                                                                                  | 1.2                                                             | 1.7                                             | 2.4                                             | 0.4 | 0.3 |
| b1932   | b1932 | yedL                                                                                  | orf, hypothetical protein                                                                        | 3                                                                             | 3.6                                                                           | 5.2                                                                           | 7.5                                                                           | 4.6                                                                                  | 3.3                                                                                  | 1.2                                                             | 0.8                                             | 0.8                                             | 0.1 | 0.2 |
| b1987   | b1987 | cbl                                                                                   | transcriptional regulator <i>cys</i> regulon; accessory regulatory circuit affecting <i>cysM</i> | 3.1                                                                           | 2.3                                                                           | 29.6                                                                          | 9.9                                                                           | 19.3                                                                                 | 2.4                                                                                  | 0.7                                                             | 1                                               | 0.7                                             | 0.1 | 0.1 |
| b1988   | b1988 | nac                                                                                   | nitrogen assimilation control protein                                                            | 15.5                                                                          | 25                                                                            | 48.2                                                                          | 25.4                                                                          | 56.2                                                                                 | 22.7                                                                                 | 0.7                                                             | 0.8                                             | 1                                               | 0   | 0   |
| b2000   | b2000 | flu                                                                                   | outer membrane fluffing protein, similar to adhesin                                              | 1                                                                             | 1.4                                                                           | 1.1                                                                           | 4.2                                                                           | 1.1                                                                                  | 1.3                                                                                  | 0.8                                                             | 1                                               | 0.9                                             | 2.3 | 0.7 |
| b2306   | b2306 | hisP                                                                                  | ATP-binding component of histidine transport                                                     | 1                                                                             | 0.6                                                                           | 3.2                                                                           | 1.8                                                                           | 8.4                                                                                  | 2                                                                                    | 1.7                                                             | 4.3                                             | 0.7                                             | 0.7 | 0.5 |
| b2307   | b2307 | hisM                                                                                  | histidine transport, membrane protein M                                                          | 1                                                                             | 0.9                                                                           | 1.8                                                                           | 1.6                                                                           | 5.3                                                                                  | 1.8                                                                                  | 1.5                                                             | 2.6                                             | 0.6                                             | 0.5 | 0.5 |
| b2308   | b2308 | hisQ                                                                                  | histidine transport system permease protein                                                      | 0.9                                                                           | 0.8                                                                           | 2.1                                                                           | 2.2                                                                           | 3.1                                                                                  | 1.4                                                                                  | 1.3                                                             | 1.9                                             | 0.6                                             | 0.6 | 0.4 |
| b2309   | b2309 | hisJ                                                                                  | histidine-binding periplasmic protein of high-affinity histidine transport system                | 0.8                                                                           | 0.6                                                                           | 4.1                                                                           | 2.5                                                                           | 7.4                                                                                  | 5.2                                                                                  | 2.7                                                             | 6.7                                             | 0.5                                             | 0.4 | 0.4 |
| b2310   | b2310 | argT                                                                                  | lysine-, arginine-, ornithine-binding periplasmic protein                                        | 1.1                                                                           | 0.6                                                                           | 10.5                                                                          | 5.5                                                                           | 18.1                                                                                 | 12                                                                                   | 6.9                                                             | 26.3                                            | 0.5                                             | 0.2 | 0.3 |
| b2393   | b2393 | nupC                                                                                  | permease of transport system for 3 nucleosides                                                   | 2                                                                             | 2.9                                                                           | 3.9                                                                           | 3.5                                                                           | 5.3                                                                                  | 2.6                                                                                  | 0.8                                                             | 1.2                                             | 0.6                                             | 0.8 | 0.3 |
| b2661   | b2661 | gabD                                                                                  | succinate-semialdehyde dehydrogenase, NADP-dependent activity                                    | 1.7                                                                           | 1.5                                                                           | 2.6                                                                           | 2                                                                             | 1.9                                                                                  | 1.4                                                                                  | 1                                                               | 0.8                                             | 1.4                                             | 0.7 | 0.8 |
| b2662   | b2662 | gabT                                                                                  | 4-aminobutyrate aminotransferase activity                                                        | 1.3                                                                           | 1.2                                                                           | 4.3                                                                           | 1.5                                                                           | 2.6                                                                                  | 1.1                                                                                  | 0.9                                                             | 0.8                                             | 1.4                                             | 0.3 | 0.5 |
| b2663   | b2663 | gabP                                                                                  | transport permease protein of gamma-aminobutyrate                                                | 2                                                                             | 2                                                                             | 5.2                                                                           | 2.7                                                                           | 2.9                                                                                  | 1.4                                                                                  | 0.8                                                             | 0.8                                             | 1.1                                             | 0.4 | 0.5 |
| b2664   | b2664 | ygaE                                                                                  | putative transcriptional regulator                                                               | 1.2                                                                           | 1                                                                             | 2.2                                                                           | 1.6                                                                           | 1.2                                                                                  | 0.8                                                                                  | 1                                                               | 0.8                                             | 1.7                                             | 0.4 | 0.6 |
| b2875   | b2875 | b2875                                                                                 | putative synthases                                                                               | 1.1                                                                           | 0.5                                                                           | 4.8                                                                           | 1.7                                                                           | 7.4                                                                                  | 1.8                                                                                  | 1.2                                                             | 4.9                                             | 1.1                                             | 0.4 | 0.3 |
| b2876   | b2876 | b2876                                                                                 | orf, hypothetical protein                                                                        | 1                                                                             | 0.9                                                                           | 3.2                                                                           |                                                                               | 3.1                                                                                  | 1.2                                                                                  | 1                                                               | 2                                               | 0.5                                             | 0.6 | 0.8 |
| b2882   | b2882 | ygfO                                                                                  | putative transport protein                                                                       | 1                                                                             | 0.9                                                                           | 0.9                                                                           | 1                                                                             | 0.7                                                                                  | 0.9                                                                                  | 0.9                                                             | 1                                               | 1.4                                             | 0.8 | 1.2 |
| b2883   | b2883 | ygfP                                                                                  | orf, hypothetical protein                                                                        | 1.2                                                                           | 1.3                                                                           | 5.1                                                                           | 2.3                                                                           | 4.2                                                                                  | 1.4                                                                                  | 1.3                                                             | 1.1                                             | 1.2                                             | 0.4 | 0.3 |
| b2884   | b2884 | ygfQ                                                                                  | orf, hypothetical protein                                                                        | 1.2                                                                           | 1.2                                                                           | 1.4                                                                           | 1                                                                             | 1.3                                                                                  | 1                                                                                    | 0.9                                                             | 1                                               | 1                                               | 0.8 | 1.1 |
| b2885   | b2885 | ygfR                                                                                  | putative oxidoreductase                                                                          | 1                                                                             | 1.1                                                                           | 1.7                                                                           | 1                                                                             | 1.2                                                                                  | 1                                                                                    | 1                                                               | 1.1                                             | 1                                               | 0.7 | 0.8 |
| b3073   | b3073 | yjgG                                                                                  | probable ornithine aminotransferase                                                              | 1.4                                                                           | 0.8                                                                           | 4.8                                                                           | 4.9                                                                           | 3.6                                                                                  | 1.8                                                                                  | 1.6                                                             | 1.7                                             | 2.2                                             | 0.2 | 0.2 |
| b3225   | b3225 | nanA                                                                                  | N-acetylneuraminatase lyase (aldolase); catabolism of sialic acid; not K-12?                     | 1.1                                                                           | 1.4                                                                           | 2.9                                                                           | 1.1                                                                           | 1.5                                                                                  | 1.2                                                                                  | 0.9                                                             | 0.9                                             | 0.9                                             | 0.6 | 1   |
| b3268   | b3268 | yhdW                                                                                  | putative periplasmic binding transport protein                                                   | 1.1                                                                           | 0.8                                                                           | 1                                                                             | 9.2                                                                           | 1.4                                                                                  | 4.4                                                                                  | 2.9                                                             | 6.7                                             | 1                                               | 1.5 | 1   |
| b3269   | b3269 | yhdX                                                                                  | putative transport system permease protein                                                       | 1.1                                                                           | 1                                                                             | 3                                                                             | 1.5                                                                           | 1.7                                                                                  | 1.1                                                                                  | 0.8                                                             | 1.3                                             | 1.1                                             | 0.6 | 0.7 |
| b3270   | b3270 | yhdY                                                                                  | putative transport system permease protein                                                       | 1.1                                                                           | 0.8                                                                           | 1                                                                             | 1.1                                                                           | 1.2                                                                                  | 0.9                                                                                  | 0.9                                                             | 1.2                                             | 1.7                                             | 0.8 | 0.8 |
| b3271   | b3271 | yhdZ                                                                                  | putative ATP-binding component of a transport system                                             | 0.9                                                                           | 0.9                                                                           | 4.4                                                                           | 1.7                                                                           | 4.2                                                                                  | 1.5                                                                                  | 1.8                                                             | 1.7                                             | 1.3                                             | 0.4 | 0.5 |
| b3509   | b3509 | hdeB                                                                                  | orf, hypothetical protein                                                                        | 4.6                                                                           | 1.1                                                                           | 2.5                                                                           | 5.4                                                                           | 1.2                                                                                  | 0.5                                                                                  | 1.4                                                             | 0.6                                             | 7.2                                             | 0.1 | 0.1 |
| b3510   | b3510 | hdeA                                                                                  | orf, hypothetical protein                                                                        | 4.8                                                                           | 1                                                                             | 2.8                                                                           | 6.7                                                                           | 1.6                                                                                  | 0.6                                                                                  | 1.7                                                             | 0.6                                             | 5.6                                             | 0.2 | 0.1 |
| b3511   | b3511 | hdeD                                                                                  | orf, hypothetical protein                                                                        | 1.5                                                                           | 1.2                                                                           | 1.7                                                                           | 2.8                                                                           | 0.9                                                                                  | 0.8                                                                                  | 1.1                                                             | 0.7                                             | 4.7                                             | 0.2 | 0.4 |
| b3512   | b3512 | yhiE                                                                                  | orf, hypothetical protein                                                                        | 3.1                                                                           |                                                                               | 3.1                                                                           | 3.2                                                                           | 1                                                                                    |                                                                                      | 0.7                                                             | 0.4                                             | 8.6                                             | 0.1 | 0   |
| b3517   | b3517 | gadA                                                                                  | glutamate decarboxylase isozyme                                                                  | 5.9                                                                           | 1.5                                                                           | 2.6                                                                           | 5.2                                                                           | 0.6                                                                                  | 0.3                                                                                  | 0.9                                                             | 0.2                                             | 10.3                                            | 0.1 | 0   |
| b3540   | b3540 | dppF                                                                                  | putative ATP-binding component of dipeptide transport system                                     | 1.8                                                                           | 2                                                                             | 3.3                                                                           | 2.4                                                                           | 5                                                                                    | 2.8                                                                                  | 1.1                                                             | 1.4                                             | 0.5                                             | 0.6 | 0.3 |
| b3541   | b3541 | dppD                                                                                  | putative ATP-binding component of dipeptide transport system                                     | 1.5                                                                           | 2.2                                                                           | 3.1                                                                           | 1.8                                                                           | 3.9                                                                                  | 2.5                                                                                  | 0.8                                                             | 1.3                                             | 0.4                                             | 0.7 | 0.5 |
| b3542   | b3542 | dppC                                                                                  | dipeptide transport system permease protein 2                                                    | 1.6                                                                           | 1.9                                                                           | 2.7                                                                           | 2.1                                                                           | 2.6                                                                                  | 2.3                                                                                  | 1                                                               | 1.2                                             | 0.5                                             | 0.7 | 0.5 |
| b3543   | b3543 | dppB                                                                                  | dipeptide transport system permease protein 1                                                    | 1.4                                                                           | 2.6                                                                           | 3.5                                                                           | 1.9                                                                           | 4.4                                                                                  | 2.4                                                                                  | 0.6                                                             | 1.2                                             | 0.3                                             | 0.8 | 0.7 |
| b3544   | b3544 | dppA                                                                                  | dipeptide transport protein                                                                      | 3.3                                                                           | 5.9                                                                           | 5.5                                                                           | 8.4                                                                           | 10.4                                                                                 | 9.6                                                                                  | 1.7                                                             | 2.5                                             | 0.5                                             | 1.3 | 0.5 |
| b3868   | b3868 | glnG                                                                                  | response regulator for gln (sensor glnL) (nitrogen regulator I, NRI)                             | 0.9                                                                           | 0.7                                                                           | 2.5                                                                           | 1.7                                                                           | 1.2                                                                                  | 1.3                                                                                  | 1.1                                                             | 1.7                                             | 1.7                                             | 0.5 | 0.3 |
| b3869   | b3869 | glnL                                                                                  | histidine protein kinase sensor for GlnG regulator (nitrogen regulator II, NRII)                 | 0.9                                                                           | 0.9                                                                           | 3.4                                                                           | 2.6                                                                           | 1.4                                                                                  | 1.6                                                                                  | 2.7                                                             | 2.1                                             | 2                                               | 0.5 | 0.2 |
| b3870   | b3870 | glnA                                                                                  | glutamine synthetase                                                                             | 1.2                                                                           | 1.1                                                                           | 11.6                                                                          | 9.3                                                                           | 24.4                                                                                 | 13.1                                                                                 | 5.2                                                             | 16.7                                            | 0.5                                             | 0.5 | 0.2 |
| b4031   | b4031 | xylE                                                                                  | xylose-proton symport                                                                            | 1.1                                                                           | 1                                                                             | 2.7                                                                           | 1.1                                                                           | 1.4                                                                                  | 0.9                                                                                  | 1.1                                                             | 0.9                                             | 3.3                                             | 0.3 | 0.7 |
| b4207   | b4207 | fkfB                                                                                  | FKBP-type 22KD peptidyl-prolyl cis-trans isomerase (rotamase)                                    | 1.3                                                                           | 1.7                                                                           | 1.6                                                                           | 2.1                                                                           | 3.5                                                                                  | 1.8                                                                                  | 0.9                                                             | 1.2                                             | 0.7                                             | 0.6 | 0.5 |
| b4208   | b4208 | cycA                                                                                  | transport of D-alanine, D-serine, and glycine                                                    | 2.5                                                                           | 3.1                                                                           | 5.2                                                                           | 2.8                                                                           | 7.9                                                                                  | 3                                                                                    | 1                                                               | 1                                               | 0.8                                             | 0.2 | 0.3 |

Operons were identified by the following criteria: The mRNA level for at least one gene in the operon was at least 2.5-fold higher in the *glnL* (Up) strain than the *glnG* strain on ammonia for arrays printed with at least one set of PCR products. See *Materials and Methods* for details.
