# Supplementary material
Source: PubMed Central journal article supplement (PMC18977)
Supplement: pnas_97_26_14674__2.pdf [file pnas_97_26_14674__2.pdf]

**Table 3.** (R/G)<sub>median</sub> of 86 genes over 11 experiments

| UNIQUID | Name  | a= <i>glnLup</i> (Cy5) vs <i>glnLup nac</i> (Cy3) [NH3], 2nd PCR =>Nac control | b= <i>glnLup</i> (Cy5) vs <i>glnLup nac</i> (Cy3) [Gln], 2nd PCR =>Nac control | c= <i>glnLup</i> (Cy5) vs <i>glnG</i> (Cy3) [NH3], 1st PCR =>NtrC&Nac control | d= <i>glnLup</i> (Cy5) vs <i>glnG</i> (Cy3) [NH3], 2nd PCR =>NtrC&Nac control | e= <i>glnLup</i> (Cy5) vs <i>glnG</i> (Cy3) [Gln], 1st PCR =>NtrC&Nac control | f= <i>glnLup</i> (Cy5) vs <i>glnG</i> (Cy3) [Gln], 2nd PCR =>NtrC&Nac control | g= <i>glnLup nac</i> (Cy5) vs <i>glnG</i> (Cy3) [NH3], 1st PCR =>NtrC control | h= <i>glnLup nac</i> (Cy5) vs <i>glnG</i> (Cy3) [Gln], 2nd PCR =>NtrC control | i= <i>Gln</i> (Cy5) vs NH3(Cy3) [ <i>glnG</i> ], 1st PCR =>other control | j=NH3(Cy5) vs <i>Gln</i> (Cy3) [ <i>glc</i> ], 1st PCR | k=NH3(Cy5) vs <i>Gln</i> (Cy3) [ <i>glv</i> ], 1st PCR |     |     |
|---------|-------|--------------------------------------------------------------------------------|--------------------------------------------------------------------------------|-------------------------------------------------------------------------------|-------------------------------------------------------------------------------|-------------------------------------------------------------------------------|-------------------------------------------------------------------------------|-------------------------------------------------------------------------------|-------------------------------------------------------------------------------|--------------------------------------------------------------------------|--------------------------------------------------------|--------------------------------------------------------|-----|-----|
| b0336   | b0336 | codB                                                                           | cytosine permease/transport                                                    | 1.8                                                                           | 6.3                                                                           | 3.1                                                                           | 2.1                                                                           | 11.9                                                                          | 6                                                                             | 0.9                                                                      | 1.1                                                    | 0.3                                                    | 0.2 | 0.1 |
| b0337   | b0337 | codA                                                                           | cytosine deaminase                                                             | 1.8                                                                           | 3.4                                                                           | 2.8                                                                           | 2.4                                                                           | 7.3                                                                           | 3.7                                                                           | 0.7                                                                      | 1                                                      | 0.4                                                    | 0.3 | 0.1 |
| b0450   | b0450 | glnK                                                                           | nitrogen regulatory protein P-II 2                                             | 0.9                                                                           | 0.7                                                                           |                                                                               | 10.3                                                                          |                                                                               | 17.2                                                                          | 19.6                                                                     | 26.1                                                   |                                                        |     |     |
| b0451   | b0451 | amtB                                                                           | probable ammonium transporter                                                  | 0.9                                                                           | 1                                                                             | 6.2                                                                           | 0.9                                                                           | 7.9                                                                           | 0.9                                                                           | 1.3                                                                      | 1                                                      | 1.2                                                    | 0.1 | 0.3 |
| b0652   | b0652 | gltL                                                                           | ATP-binding protein of glutamate/aspartate transport system                    | 1.1                                                                           | 0.8                                                                           | 1.5                                                                           | 1.2                                                                           | 1.7                                                                           | 1.3                                                                           | 1.5                                                                      | 1.4                                                    | 1.1                                                    | 0.8 | 0.9 |
| b0653   | b0653 | gltK                                                                           | glutamate/aspartate transport system permease                                  | 1                                                                             | 0.9                                                                           | 1.6                                                                           | 1.1                                                                           | 2                                                                             | 1.3                                                                           | 1.1                                                                      | 1.6                                                    | 0.8                                                    | 1   | 1.1 |
| b0654   | b0654 | gltJ                                                                           | glutamate/aspartate transport system permease                                  | 1.1                                                                           | 1.1                                                                           | 1.7                                                                           | 1.1                                                                           | 2.2                                                                           |                                                                               | 1.4                                                                      | 1.2                                                    | 0.6                                                    | 0.8 | 0.7 |
| b0655   | b0655 | ybeJ                                                                           | putative periplasmic binding transport protein                                 | 1.3                                                                           | 1.4                                                                           | 3.4                                                                           | 0.8                                                                           | 6.5                                                                           | 1.1                                                                           | 1.6                                                                      | 1                                                      | 0.9                                                    | 0.8 | 0.7 |
| b0809   | b0809 | glnQ                                                                           | ATP-binding component of glutamine high-affinity transport system              | 1.1                                                                           | 0.4                                                                           | 2.7                                                                           | 1.9                                                                           | 3.6                                                                           | 2                                                                             | 1.3                                                                      | 4.9                                                    | 0.8                                                    | 0.5 | 0.5 |
| b0810   | b0810 | glnP                                                                           | glutamine high-affinity transport system; membrane component                   | 1.2                                                                           | 0.6                                                                           | 3.5                                                                           | 2.1                                                                           | 6                                                                             | 2.9                                                                           | 2.3                                                                      | 6.4                                                    | 1                                                      | 0.4 | 0.5 |
| b0811   | b0811 | glnH                                                                           | periplasmic glutamine-binding protein; permease                                | 1                                                                             | 0.5                                                                           | 4.5                                                                           | 5.8                                                                           | 9.4                                                                           | 4.7                                                                           | 5.9                                                                      | 11.3                                                   | 1.1                                                    | 0.3 | 0.4 |
| b0854   | b0854 | potF                                                                           | periplasmic putrescine-binding protein; permease protein                       | 1.4                                                                           | 0.9                                                                           | 4.8                                                                           | 3.4                                                                           | 6.3                                                                           | 2.6                                                                           | 2.6                                                                      | 3.7                                                    | 1.3                                                    | 0.3 | 0.3 |
| b0855   | b0855 | potG                                                                           | ATP-binding component of putrescine transport system                           | 1.3                                                                           | 0.8                                                                           | 1.9                                                                           | 2.1                                                                           | 4                                                                             | 1.6                                                                           | 1.2                                                                      | 2.3                                                    | 1                                                      | 0.4 | 0.4 |
| b0856   | b0856 | potH                                                                           | putrescine transport protein; permease                                         | 1.2                                                                           | 0.9                                                                           | 2.5                                                                           | 1.5                                                                           | 2.6                                                                           | 1.2                                                                           | 1.2                                                                      | 1.9                                                    | 0.9                                                    | 0.5 | 0.5 |
| b0857   | b0857 | potI                                                                           | putrescine transport protein; permease                                         | 1.1                                                                           | 0.9                                                                           | 1.2                                                                           | 1.1                                                                           | 1.7                                                                           | 0.9                                                                           | 0.6                                                                      | 1.3                                                    | 0.9                                                    | 0.7 | 0.7 |
| b0929   | b0929 | ompF                                                                           | outer membrane protein 1a (Ia;b;F)                                             | 2.6                                                                           | 8.8                                                                           | 4.1                                                                           | 4.9                                                                           | 24.9                                                                          | 28.8                                                                          | 2.1                                                                      | 2.8                                                    | 0.2                                                    | 0.5 | 0.6 |
| b1006   | b1006 | ycdG                                                                           | putative transport protein                                                     | 1.1                                                                           | 0.6                                                                           | 5.1                                                                           | 2.6                                                                           | 6.5                                                                           | 2.4                                                                           | 1.5                                                                      | 5.9                                                    | 1                                                      | 0.2 | 0.2 |
| b1007   | b1007 | b1007                                                                          | orf, hypothetical protein                                                      | 1                                                                             | 0.6                                                                           | 1.8                                                                           | 2                                                                             | 6.6                                                                           | 3.1                                                                           | 2.3                                                                      | 6.4                                                    | 1                                                      | 0.3 | 0.2 |
| b1008   | b1008 | b1008                                                                          | putative enzyme                                                                | 1                                                                             | 0.7                                                                           | 16                                                                            | 2.4                                                                           | 16.9                                                                          | 3                                                                             | 2.4                                                                      | 6.1                                                    | 1.5                                                    | 0.3 | 0.1 |
| b1009   | b1009 | b1009                                                                          | putative acetyltransferase                                                     | 1                                                                             | 0.7                                                                           | 7.1                                                                           | 4.4                                                                           | 17.1                                                                          | 3.5                                                                           | 3.3                                                                      | 9.3                                                    | 1                                                      | 0.3 | 0.1 |
| b1010   | b1010 | b1010                                                                          | orf, hypothetical protein                                                      | 1                                                                             | 0.6                                                                           | 4                                                                             | 1.9                                                                           | 2.8                                                                           | 2.6                                                                           | 2.4                                                                      | 4.3                                                    | 0.8                                                    | 0.6 | 0.3 |
| b1011   | b1011 | b1011                                                                          | putative synthetase                                                            | 1.2                                                                           | 0.6                                                                           | 25                                                                            | 5.5                                                                           | 32.9                                                                          | 3.4                                                                           | 2.7                                                                      | 8.4                                                    | 1                                                      | 0.2 | 0.1 |
| b1012   | b1012 | b1012                                                                          | orf, hypothetical protein                                                      | 1.2                                                                           | 0.7                                                                           | 26.3                                                                          | 10.6                                                                          | 51.8                                                                          | 6.7                                                                           | 4.3                                                                      | 15.8                                                   | 1.1                                                    | 0.1 | 0.1 |
| b1034   | b1034 | ycdX                                                                           | orf, hypothetical protein                                                      | 1                                                                             | 1.1                                                                           | 3.6                                                                           | 1.1                                                                           | 4.9                                                                           | 1.1                                                                           | 0.9                                                                      | 1.1                                                    | 1.1                                                    | 0.7 | 0.6 |
| b1035   | b1035 | ycdY                                                                           | putative oxidoreductase component                                              | 0.9                                                                           | 0.9                                                                           | 0.7                                                                           | 1.1                                                                           | 0.9                                                                           | 1                                                                             | 1.4                                                                      | 1.1                                                    | 0.9                                                    | 1.3 | 1.5 |
| b1217   | b1217 | chaB                                                                           | cation transport regulator                                                     | 1.1                                                                           | 0.9                                                                           | 1                                                                             | 1.2                                                                           | 1.1                                                                           | 0.8                                                                           | 1                                                                        | 0.9                                                    | 0.9                                                    | 1   | 1   |
| b1218   | b1218 | chaC                                                                           | cation transport regulator                                                     | 1.2                                                                           | 0.7                                                                           | 3.8                                                                           | 1.7                                                                           | 5.3                                                                           | 1.5                                                                           | 1.1                                                                      | 2.5                                                    | 1.4                                                    | 0.2 | 0.4 |
| b1243   | b1243 | oppA                                                                           | oligopeptide transport; periplasmic binding protein                            | 1.4                                                                           | 1.7                                                                           | 2                                                                             | 2.8                                                                           | 5.8                                                                           | 3.7                                                                           | 1.4                                                                      | 2.7                                                    | 0.3                                                    | 2.4 | 0.9 |
| b1244   | b1244 | oppB                                                                           | oligopeptide transport permease protein                                        | 1.3                                                                           | 1.6                                                                           | 1.4                                                                           | 1.6                                                                           | 3.3                                                                           | 2.2                                                                           | 0.9                                                                      | 1.4                                                    | 0.3                                                    | 1.2 | 0.9 |
| b1245   | b1245 | oppC                                                                           | homolog of Salmonella oligopeptide transport permease protein                  | 1.2                                                                           | 1.4                                                                           | 1.3                                                                           | 1.2                                                                           | 3                                                                             |                                                                               | 0.9                                                                      | 1.4                                                    | 0.4                                                    | 1.1 | 1   |
| b1246   | b1246 | oppD                                                                           | homolog of Salmonella ATP-binding protein of oligopeptide ABC transport system | 1.3                                                                           | 1.6                                                                           | 1.6                                                                           | 1.3                                                                           | 3.9                                                                           | 1.7                                                                           | 1.3                                                                      | 1.2                                                    | 0.4                                                    | 0.8 | 0.7 |
| b1296   | b1296 | ycjJ                                                                           | putative amino acid/amine transport protein                                    | 1.2                                                                           | 1.1                                                                           | 3                                                                             | 1.2                                                                           | 2.7                                                                           | 0.9                                                                           | 0.8                                                                      | 1.1                                                    | 1.8                                                    | 0.5 | 0.4 |
| b1384   | b1384 | feaR                                                                           | regulatory protein for 2-phenylethylamine catabolism                           | 1.3                                                                           | 1.3                                                                           | 2.7                                                                           | 1.9                                                                           | 3.6                                                                           | 1.1                                                                           | 0.8                                                                      | 0.9                                                    | 0.7                                                    | 0.3 | 0.9 |
| b1440   | b1440 | b1440                                                                          | putative transport protein                                                     | 2.5                                                                           | 6.1                                                                           | 3.8                                                                           | 3                                                                             | 7.4                                                                           | 4.8                                                                           | 0.7                                                                      | 0.9                                                    | 1                                                      | 0.4 | 0.3 |
| b1441   | b1441 | b1441                                                                          | putative ATP-binding component of a transport system                           | 1.8                                                                           | 2.3                                                                           | 2.1                                                                           | 1.8                                                                           | 3.3                                                                           | 2.3                                                                           | 2.2                                                                      | 1                                                      | 1.3                                                    | 0.6 | 0.5 |
| b1442   | b1442 | b1442                                                                          | putative transport system permease protein                                     | 1.3                                                                           | 2.1                                                                           | 2.6                                                                           | 1.4                                                                           | 3.9                                                                           | 1.8                                                                           | 0.8                                                                      | 1                                                      | 1.1                                                    | 0.6 | 0.6 |
| b1443   | b1443 | b1443                                                                          | putative transport system permease protein                                     | 1.9                                                                           | 2                                                                             | 1.6                                                                           | 1.8                                                                           | 2.6                                                                           | 1.8                                                                           | 0.9                                                                      | 1                                                      | 0.9                                                    | 0.7 | 0.5 |
| b1444   | b1444 | b1444                                                                          | putative aldehyde dehydrogenase                                                | 1.9                                                                           | 2.2                                                                           | 3.8                                                                           | 4.3                                                                           | 5.3                                                                           | 2.6                                                                           | 1.2                                                                      | 1.2                                                    | 1.2                                                    | 0.3 | 0.3 |
| b1483   | b1483 | b1483                                                                          | putative ATP-binding component of a transport system                           | 0.9                                                                           | 0.9                                                                           | 5.3                                                                           | 2                                                                             | 4.5                                                                           | 1.7                                                                           | 1.9                                                                      | 2.5                                                    | 1.3                                                    | 0.6 | 0.3 |
| b1484   | b1484 | b1484                                                                          | putative ATP-binding component of a transport system                           | 1.1                                                                           | 0.9                                                                           | 6.9                                                                           | 2.4                                                                           | 6.7                                                                           | 2.9                                                                           | 1.8                                                                      | 3.6                                                    | 0.9                                                    | 0.5 | 0.3 |
| b1485   | b1485 | b1485                                                                          | putative transport protein                                                     | 1.1                                                                           | 0.9                                                                           | 4.9                                                                           | 2.1                                                                           | 7.2                                                                           | 2.1                                                                           | 1.5                                                                      | 2.9                                                    | 1                                                      | 0.5 | 0.5 |
| b1486   | b1486 | b1486                                                                          | putative transport system permease protein                                     | 1.1                                                                           | 0.9                                                                           | 1                                                                             | 1.9                                                                           | 1.2                                                                           | 2.2                                                                           | 2.5                                                                      | 3.2                                                    | 0.8                                                    | 1.1 | 0.8 |
| b1487   | b1487 | b1487                                                                          | putative hemin-binding lipoprotein                                             | 1                                                                             | 0.6                                                                           | 50.4                                                                          | 18.3                                                                          | 65.3                                                                          | 7.2                                                                           | 4.9                                                                      | 15.2                                                   | 0.9                                                    | 0   | 0.1 |
| b1488   | b1488 | b1488                                                                          | orf, hypothetical protein                                                      | 0.8                                                                           | 0.8                                                                           | 9.7                                                                           | 4.7                                                                           | 14.6                                                                          | 3.1                                                                           | 4.1                                                                      | 4.9                                                    | 0.8                                                    | 0.1 | 0.1 |
| b1744   | b1744 | ydjS                                                                           | orf, hypothetical protein                                                      | 0.9                                                                           | 0.8                                                                           | 6.9                                                                           | 1.6                                                                           | 6.3                                                                           | 1.3                                                                           | 1.4                                                                      | 1.9                                                    | 1.2                                                    | 0.3 | 0.3 |
| b1745   | b1745 | b1745                                                                          | orf, hypothetical protein                                                      | 0.9                                                                           | 0.7                                                                           | 4                                                                             | 1.8                                                                           | 5.3                                                                           | 1.7                                                                           | 1.5                                                                      | 2.6                                                    | 1.3                                                    | 0.4 | 0.4 |
| b1746   | b1746 | b1746                                                                          | putative aldehyde dehydrogenase                                                | 0.9                                                                           | 0.7                                                                           | 11.5                                                                          | 2                                                                             | 7.3                                                                           | 1.6                                                                           | 1.4                                                                      | 2.4                                                    | 1.4                                                    | 0.3 | 0.2 |
| b1747   | b1747 | b1747                                                                          | orf, hypothetical protein                                                      | 0.8                                                                           | 0.8                                                                           | 2.3                                                                           | 2.9                                                                           | 8.2                                                                           | 1.8                                                                           | 1.8                                                                      | 3.6                                                    | 0.8                                                    | 0.3 | 0.2 |

| UNIQUID | Name  | a= <i>glnLup</i> (Cy5) vs <i>glnLup nac</i> (Cy3) [NH3], 2nd PCR =>Nac control | b= <i>glnLup</i> (Cy5) vs <i>glnLup nac</i> (Cy3) [Gln], 2nd PCR =>Nac control                    | c= <i>glnLup</i> (Cy5) vs <i>glnG</i> (Cy3) [NH3], 1st PCR =>NtrC&Nac control | d= <i>glnLup</i> (Cy5) vs <i>glnG</i> (Cy3) [NH3], 2nd PCR =>NtrC&Nac control | e= <i>glnLup</i> (Cy5) vs <i>glnG</i> (Cy3) [Gln], 1st PCR =>NtrC&Nac control | f= <i>glnLup</i> (Cy5) vs <i>glnG</i> (Cy3) [Gln], 2nd PCR =>NtrC&Nac control | g= <i>glnLup nac</i> (Cy5) vs <i>glnG</i> (Cy3) [NH3], 1st PCR =>NtrC control | h= <i>glnLup nac</i> (Cy5) vs <i>glnG</i> (Cy3) [Gln], 2nd PCR =>NtrC control | i=Gln(Cy5) vs NH3(Cy3) [ <i>glnG</i> ], 1st PCR =>other control | j=NH3(Cy5) vs Gln(Cy3) [ <i>glnG</i> ], 1st PCR | k=NH3(Cy5) vs Gln(Cy3) [ <i>glnG</i> ], 1st PCR |     |     |
|---------|-------|--------------------------------------------------------------------------------|---------------------------------------------------------------------------------------------------|-------------------------------------------------------------------------------|-------------------------------------------------------------------------------|-------------------------------------------------------------------------------|-------------------------------------------------------------------------------|-------------------------------------------------------------------------------|-------------------------------------------------------------------------------|-----------------------------------------------------------------|-------------------------------------------------|-------------------------------------------------|-----|-----|
| b1748   | b1748 | cstC                                                                           | acetylornithine delta-aminotransferase                                                            | 0.8                                                                           | 0.6                                                                           | 7.7                                                                           | 3.6                                                                           | 10.9                                                                          | 3.4                                                                           | 2.2                                                             | 7.9                                             | 0.7                                             | 0.2 | 0.2 |
| b1783   | b1783 | yeaG                                                                           | orf, hypothetical protein                                                                         | 1.4                                                                           | 0.5                                                                           | 4.5                                                                           | 4.4                                                                           | 2.9                                                                           | 1.1                                                                           | 1.7                                                             | 2.4                                             | 3                                               | 0.6 | 0.3 |
| b1784   | b1784 | yeaH                                                                           | orf, hypothetical protein                                                                         | 1.2                                                                           | 0.6                                                                           | 4.1                                                                           | 3.1                                                                           | 2.5                                                                           | 0.9                                                                           | 1.2                                                             | 1.7                                             | 2.4                                             | 0.4 | 0.3 |
| b1932   | b1932 | yedL                                                                           | orf, hypothetical protein                                                                         | 3                                                                             | 3.6                                                                           | 5.2                                                                           | 7.5                                                                           | 4.6                                                                           | 3.3                                                                           | 1.2                                                             | 0.8                                             | 0.8                                             | 0.1 | 0.2 |
| b1987   | b1987 | cbl                                                                            | transcriptional regulator <i>cys regulon</i> ; accessory regulatory circuit affecting <i>cysM</i> | 3.1                                                                           | 2.3                                                                           | 29.6                                                                          | 9.9                                                                           | 19.3                                                                          | 2.4                                                                           | 0.7                                                             | 1                                               | 0.7                                             | 0.1 | 0.1 |
| b1988   | b1988 | nac                                                                            | nitrogen assimilation control protein                                                             | 15.5                                                                          | 25                                                                            | 48.2                                                                          | 25.4                                                                          | 56.2                                                                          | 22.7                                                                          | 0.7                                                             | 0.8                                             | 1                                               | 0   | 0   |
| b2306   | b2306 | hisP                                                                           | ATP-binding component of histidine transport                                                      | 1                                                                             | 0.6                                                                           | 3.2                                                                           | 1.8                                                                           | 8.4                                                                           | 2                                                                             | 1.7                                                             | 4.3                                             | 0.7                                             | 0.7 | 0.5 |
| b2307   | b2307 | hisM                                                                           | histidine transport, membrane protein M                                                           | 1                                                                             | 0.9                                                                           | 1.8                                                                           | 1.6                                                                           | 5.3                                                                           | 1.8                                                                           | 1.5                                                             | 2.6                                             | 0.6                                             | 0.5 | 0.5 |
| b2308   | b2308 | hisQ                                                                           | histidine transport system permease protein                                                       | 0.9                                                                           | 0.8                                                                           | 2.1                                                                           | 2.2                                                                           | 3.1                                                                           | 1.4                                                                           | 1.3                                                             | 1.9                                             | 0.6                                             | 0.6 | 0.4 |
| b2309   | b2309 | hisJ                                                                           | histidine-binding periplasmic protein of high-affinity histidine transport system                 | 0.8                                                                           | 0.6                                                                           | 4.1                                                                           | 2.5                                                                           | 7.4                                                                           | 5.2                                                                           | 2.7                                                             | 6.7                                             | 0.5                                             | 0.4 | 0.4 |
| b2310   | b2310 | argT                                                                           | lysine-, arginine-, ornithine-binding periplasmic protein                                         | 1.1                                                                           | 0.6                                                                           | 10.5                                                                          | 5.5                                                                           | 18.1                                                                          | 12                                                                            | 6.9                                                             | 26.3                                            | 0.5                                             | 0.2 | 0.3 |
| b2393   | b2393 | nupC                                                                           | permease of transport system for 3 nucleosides                                                    | 2                                                                             | 2.9                                                                           | 3.9                                                                           | 3.5                                                                           | 5.3                                                                           | 2.6                                                                           | 0.8                                                             | 1.2                                             | 0.6                                             | 0.8 | 0.3 |
| b2661   | b2661 | gabD                                                                           | succinate-semialdehyde dehydrogenase, NADP-dependent activity                                     | 1.7                                                                           | 1.5                                                                           | 2.6                                                                           | 2                                                                             | 1.9                                                                           | 1.4                                                                           | 1                                                               | 0.8                                             | 1.4                                             | 0.7 | 0.8 |
| b2662   | b2662 | gabT                                                                           | 4-aminobutyrate aminotransferase activity                                                         | 1.3                                                                           | 1.2                                                                           | 4.3                                                                           | 1.5                                                                           | 2.6                                                                           | 1.1                                                                           | 0.9                                                             | 0.8                                             | 1.4                                             | 0.3 | 0.5 |
| b2663   | b2663 | gabP                                                                           | transport permease protein of gamma-aminobutyrate                                                 | 2                                                                             | 2                                                                             | 5.2                                                                           | 2.7                                                                           | 2.9                                                                           | 1.4                                                                           | 0.8                                                             | 0.8                                             | 1.1                                             | 0.4 | 0.5 |
| b2664   | b2664 | ygaE                                                                           | putative transcriptional regulator                                                                | 1.2                                                                           | 1                                                                             | 2.2                                                                           | 1.6                                                                           | 1.2                                                                           | 0.8                                                                           | 1                                                               | 0.8                                             | 1.7                                             | 0.4 | 0.6 |
| b2875   | b2875 | b2875                                                                          | putative synthases                                                                                | 1.1                                                                           | 0.5                                                                           | 4.8                                                                           | 1.7                                                                           | 7.4                                                                           | 1.8                                                                           | 1.2                                                             | 4.9                                             | 1.1                                             | 0.4 | 0.3 |
| b2876   | b2876 | b2876                                                                          | orf, hypothetical protein                                                                         | 1                                                                             | 0.9                                                                           | 3.2                                                                           |                                                                               | 3.1                                                                           | 1.2                                                                           | 1                                                               | 2                                               | 0.5                                             | 0.6 | 0.8 |
| b2882   | b2882 | ygfO                                                                           | putative transport protein                                                                        | 1                                                                             | 0.9                                                                           | 0.9                                                                           | 1                                                                             | 0.7                                                                           | 0.9                                                                           | 0.9                                                             | 1                                               | 1.4                                             | 0.8 | 1.2 |
| b2883   | b2883 | ygfP                                                                           | orf, hypothetical protein                                                                         | 1.2                                                                           | 1.3                                                                           | 5.1                                                                           | 2.3                                                                           | 4.2                                                                           | 1.4                                                                           | 1.3                                                             | 1.1                                             | 1.2                                             | 0.4 | 0.3 |
| b2884   | b2884 | ygfQ                                                                           | orf, hypothetical protein                                                                         | 1.2                                                                           | 1.2                                                                           | 1.4                                                                           | 1                                                                             | 1.3                                                                           | 1                                                                             | 0.9                                                             | 1                                               | 1                                               | 0.8 | 1.1 |
| b2885   | b2885 | ygfR                                                                           | putative oxidoreductase                                                                           | 1                                                                             | 1.1                                                                           | 1.7                                                                           | 1                                                                             | 1.2                                                                           | 1                                                                             | 1                                                               | 1.1                                             | 1                                               | 0.7 | 0.8 |
| b3073   | b3073 | yjgG                                                                           | probable ornithine aminotransferase                                                               | 1.4                                                                           | 0.8                                                                           | 4.8                                                                           | 4.9                                                                           | 3.6                                                                           | 1.8                                                                           | 1.6                                                             | 1.7                                             | 2.2                                             | 0.2 | 0.2 |
| b3268   | b3268 | yhdW                                                                           | putative periplasmic binding transport protein                                                    | 1.1                                                                           | 0.8                                                                           | 1                                                                             | 9.2                                                                           | 1.4                                                                           | 4.4                                                                           | 2.9                                                             | 6.7                                             | 1                                               | 1.5 | 1   |
| b3269   | b3269 | yhdX                                                                           | putative transport system permease protein                                                        | 1.1                                                                           | 1                                                                             | 3                                                                             | 1.5                                                                           | 1.7                                                                           | 1.1                                                                           | 0.8                                                             | 1.3                                             | 1.1                                             | 0.6 | 0.7 |
| b3270   | b3270 | yhdY                                                                           | putative transport system permease protein                                                        | 1.1                                                                           | 0.8                                                                           | 1                                                                             | 1.1                                                                           | 1.2                                                                           | 0.9                                                                           | 0.9                                                             | 1.2                                             | 1.7                                             | 0.8 | 0.8 |
| b3271   | b3271 | yhdZ                                                                           | putative ATP-binding component of a transport system                                              | 0.9                                                                           | 0.9                                                                           | 4.4                                                                           | 1.7                                                                           | 4.2                                                                           | 1.5                                                                           | 1.8                                                             | 1.7                                             | 1.3                                             | 0.4 | 0.5 |
| b3512   | b3512 | yhiE                                                                           | orf, hypothetical protein                                                                         | 3.1                                                                           |                                                                               | 3.1                                                                           | 3.2                                                                           | 1                                                                             |                                                                               | 0.7                                                             | 0.4                                             | 8.6                                             | 0.1 | 0   |
| b3540   | b3540 | dppF                                                                           | putative ATP-binding component of dipeptide transport system                                      | 1.8                                                                           | 2                                                                             | 3.3                                                                           | 2.4                                                                           | 5                                                                             | 2.8                                                                           | 1.1                                                             | 1.4                                             | 0.5                                             | 0.6 | 0.3 |
| b3541   | b3541 | dppD                                                                           | putative ATP-binding component of dipeptide transport system                                      | 1.5                                                                           | 2.2                                                                           | 3.1                                                                           | 1.8                                                                           | 3.9                                                                           | 2.5                                                                           | 0.8                                                             | 1.3                                             | 0.4                                             | 0.7 | 0.5 |
| b3542   | b3542 | dppC                                                                           | dipeptide transport system permease protein 2                                                     | 1.6                                                                           | 1.9                                                                           | 2.7                                                                           | 2.1                                                                           | 2.6                                                                           | 2.3                                                                           | 1                                                               | 1.2                                             | 0.5                                             | 0.7 | 0.5 |
| b3543   | b3543 | dppB                                                                           | dipeptide transport system permease protein 1                                                     | 1.4                                                                           | 2.6                                                                           | 3.5                                                                           | 1.9                                                                           | 4.4                                                                           | 2.4                                                                           | 0.6                                                             | 1.2                                             | 0.3                                             | 0.8 | 0.7 |
| b3544   | b3544 | dppA                                                                           | dipeptide transport protein                                                                       | 3.3                                                                           | 5.9                                                                           | 5.5                                                                           | 8.4                                                                           | 10.4                                                                          | 9.6                                                                           | 1.7                                                             | 2.5                                             | 0.5                                             | 1.3 | 0.5 |
| b3868   | b3868 | glnG                                                                           | response regulator for <i>gln</i> (sensor <i>glnL</i> ) (nitrogen regulator I, NRI)               | 0.9                                                                           | 0.7                                                                           | 2.5                                                                           | 1.7                                                                           | 1.2                                                                           | 1.3                                                                           | 1.1                                                             | 1.7                                             | 1.7                                             | 0.5 | 0.3 |
| b3869   | b3869 | glnL                                                                           | histidine protein kinase sensor for <i>GlnG</i> regulator (nitrogen regulator II, NRII)           | 0.9                                                                           | 0.9                                                                           | 3.4                                                                           | 2.6                                                                           | 1.4                                                                           | 1.6                                                                           | 2.7                                                             | 2.1                                             | 2                                               | 0.5 | 0.2 |
| b3870   | b3870 | glnA                                                                           | glutamine synthetase                                                                              | 1.2                                                                           | 1.1                                                                           | 11.6                                                                          | 9.3                                                                           | 24.4                                                                          | 13.1                                                                          | 5.2                                                             | 16.7                                            | 0.5                                             | 0.5 | 0.2 |
| b4207   | b4207 | fklB                                                                           | FKBP-type 22KD peptidyl-prolyl cis-trans isomerase (rotamase)                                     | 1.3                                                                           | 1.7                                                                           | 1.6                                                                           | 2.1                                                                           | 3.5                                                                           | 1.8                                                                           | 0.9                                                             | 1.2                                             | 0.7                                             | 0.6 | 0.5 |
| b4208   | b4208 | cycA                                                                           | transport of D-alanine, D-serine, and glycine                                                     | 2.5                                                                           | 3.1                                                                           | 5.2                                                                           | 2.8                                                                           | 7.9                                                                           | 3                                                                             | 1                                                               | 1                                               | 0.8                                             | 0.2 | 0.3 |

Operons were selected by the following: For those genes that met the criteria for Table 2, selected were those genes that were >2.5-fold higher in *gln* (Up) compared to *gln* when both were grown on glutamine. See *Materials and Methods* for details.
